# Supplementary figures and images for: HD-ZIP Transcription Factors and Brassinosteroid Signaling Play a Role in Capitulum Patterning in Chrysanthemum
Source: MDPI journal article supplement (doi:10.3390/ijms24087655), 2023-04-21

Figure S1

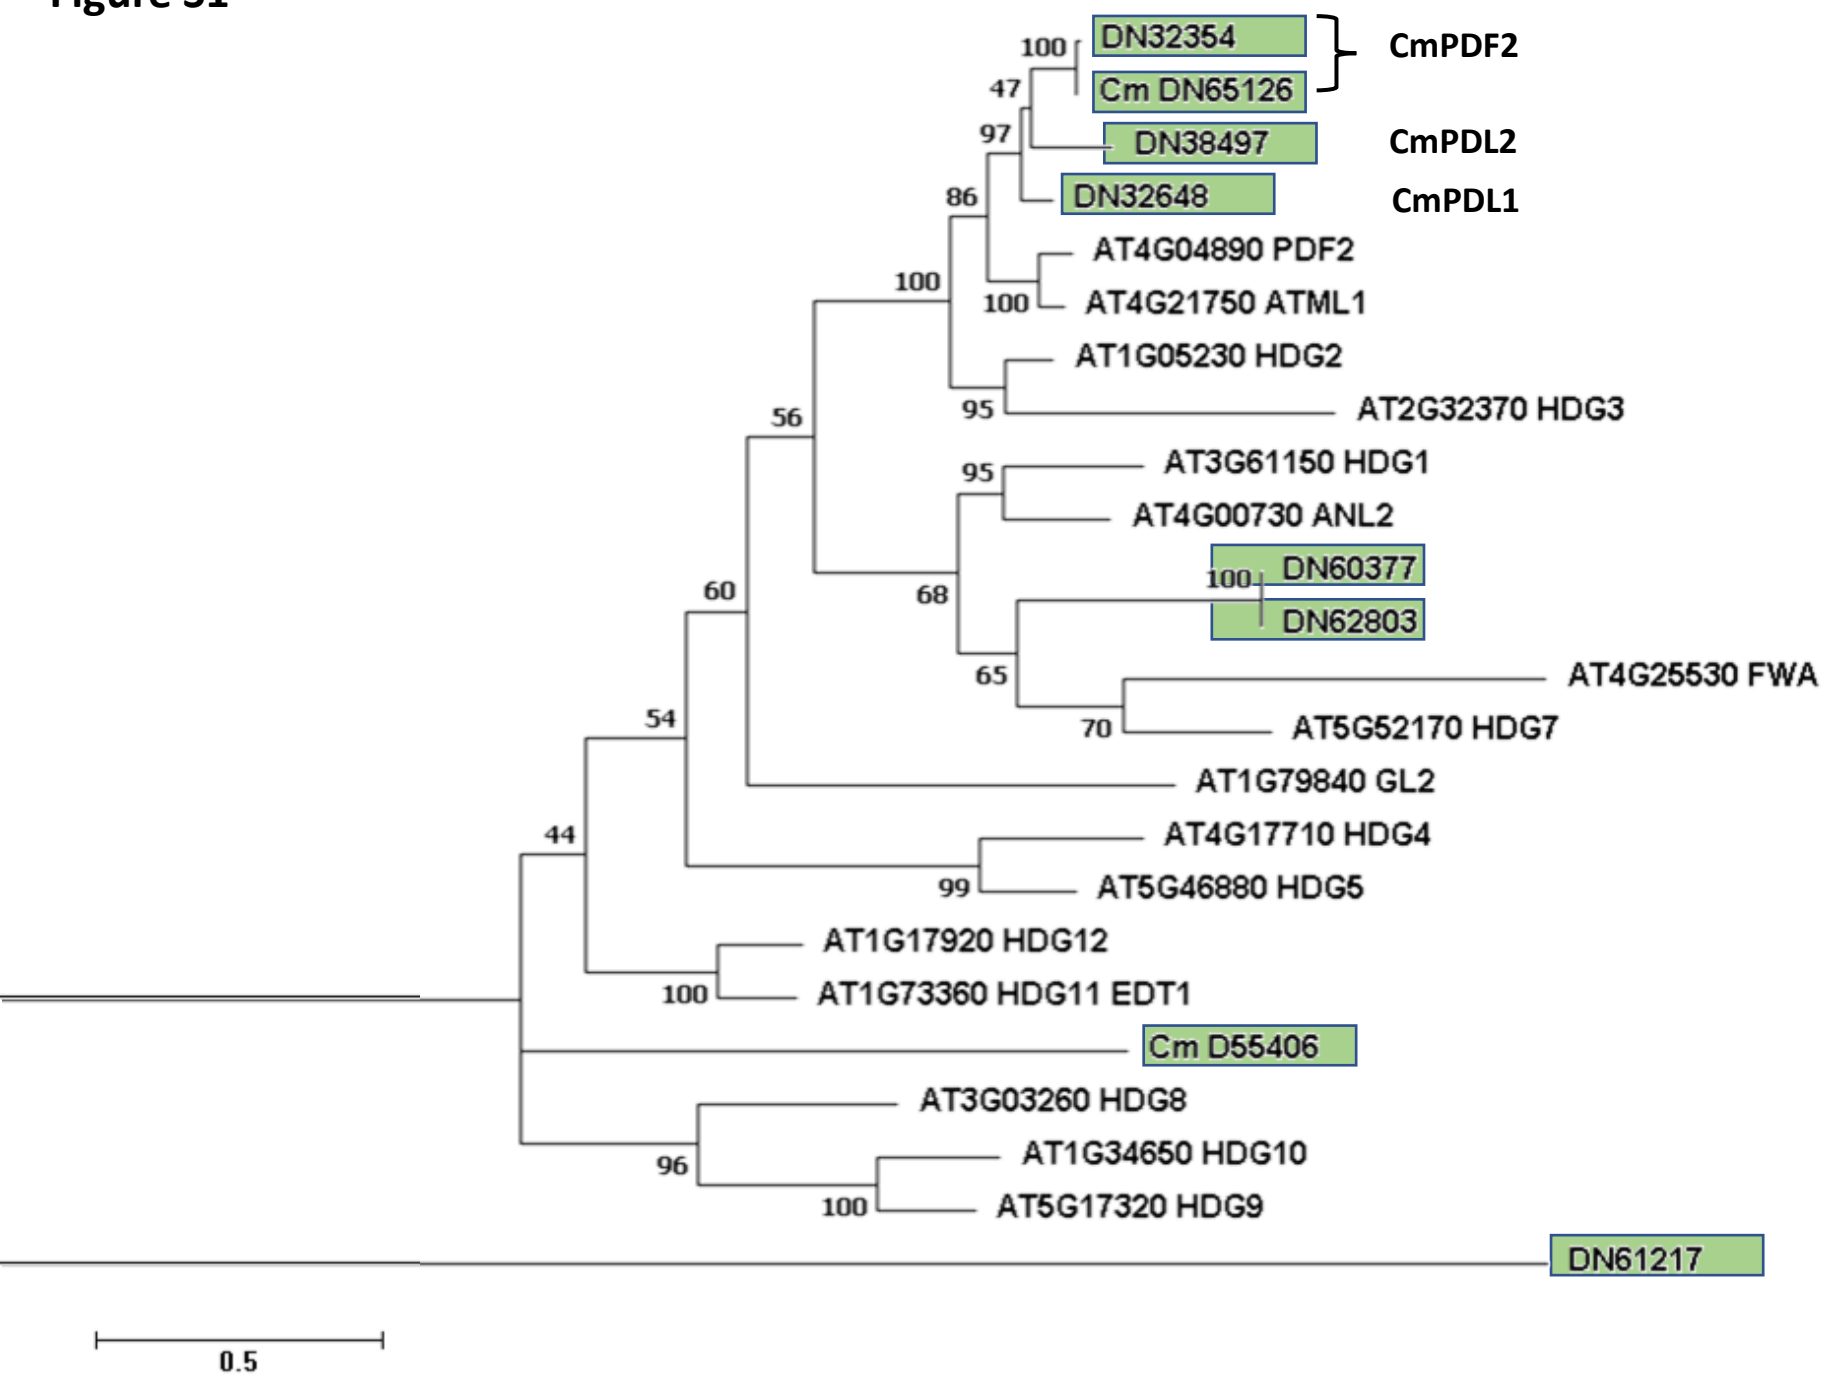

Figure S2

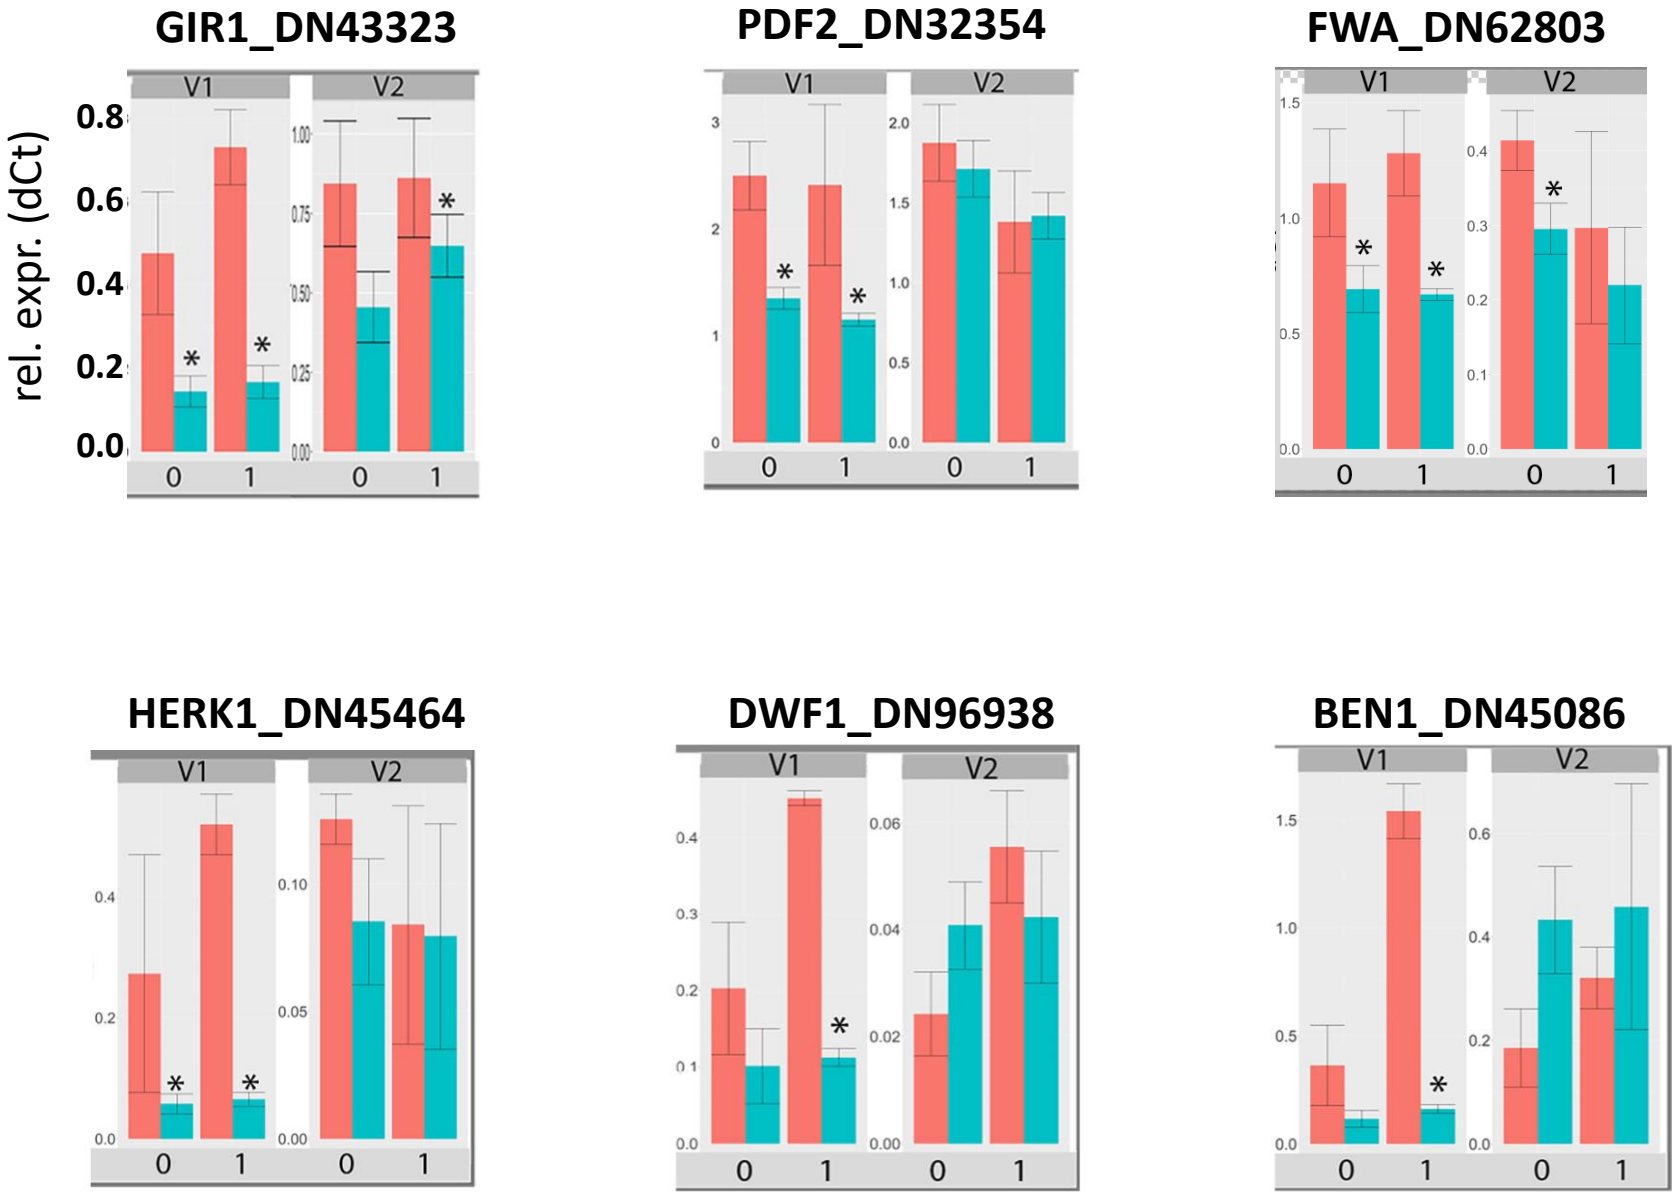

Figure S3

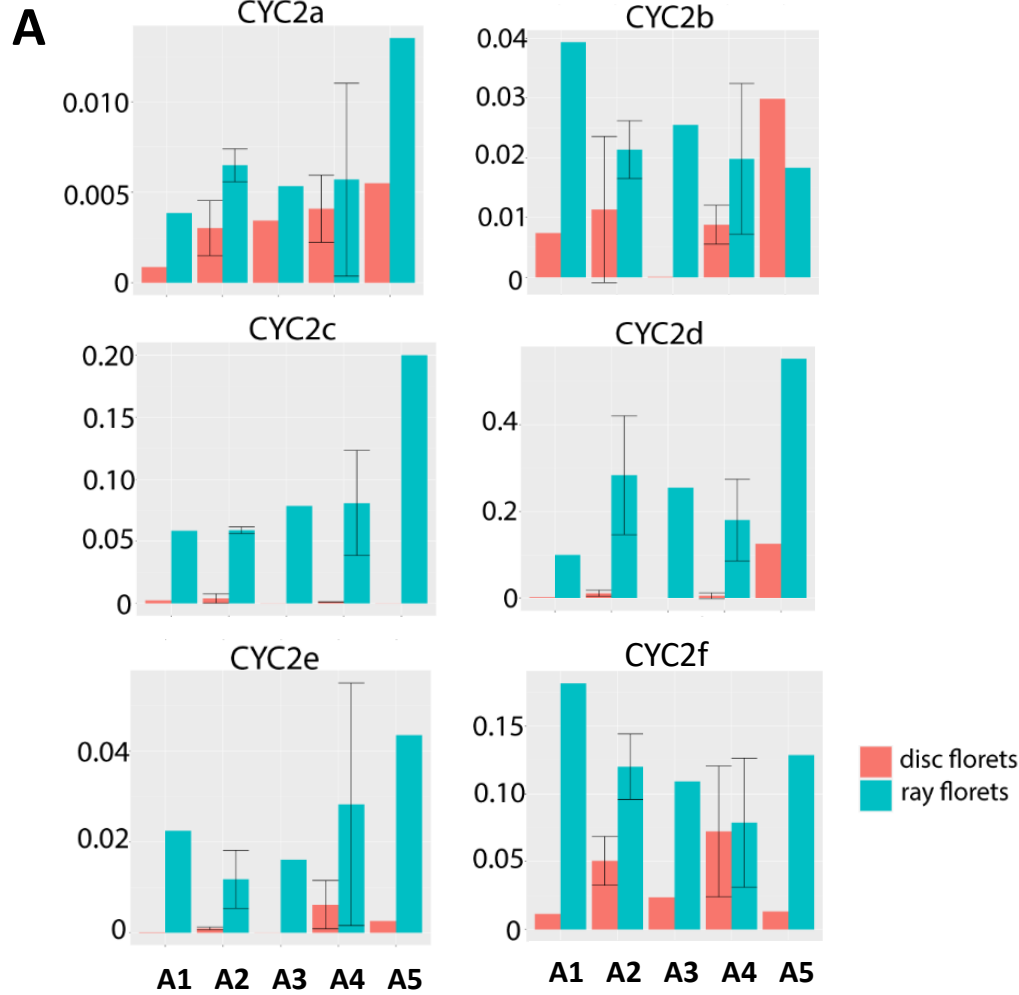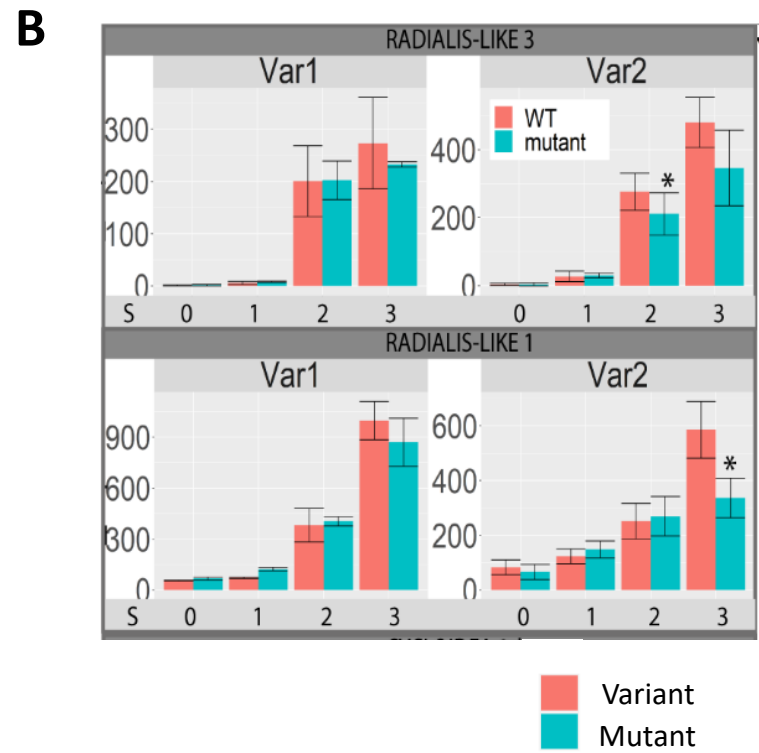

Figure S4

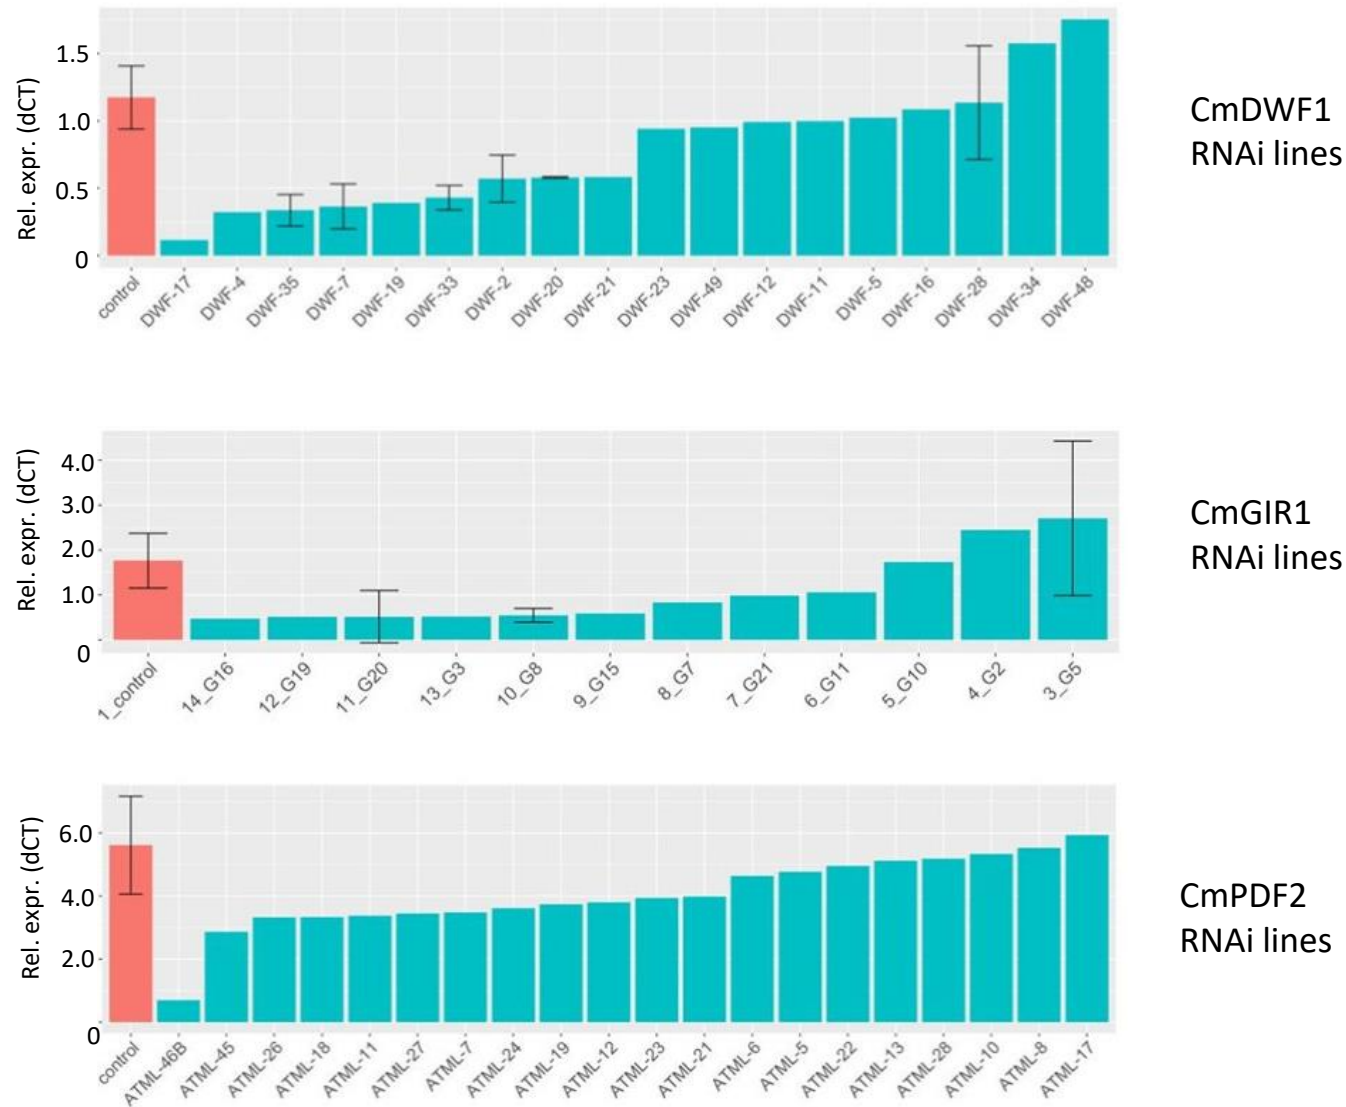

Figure S5

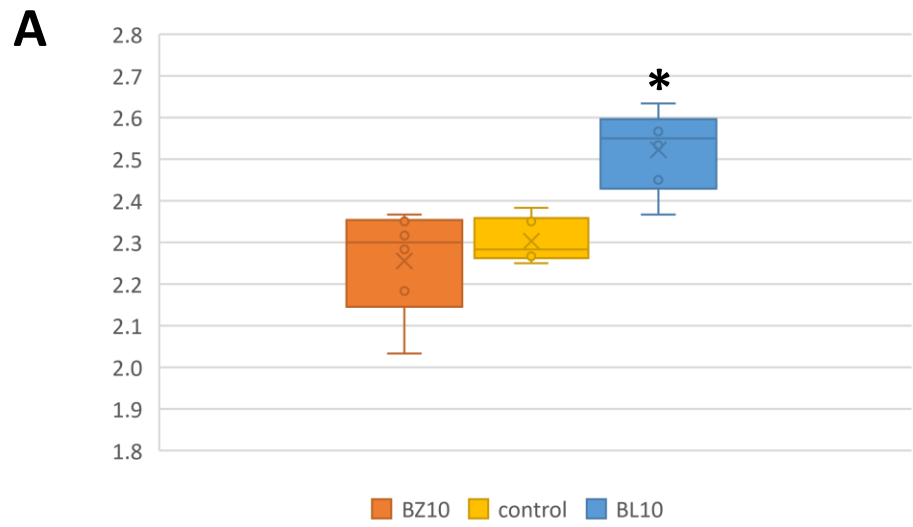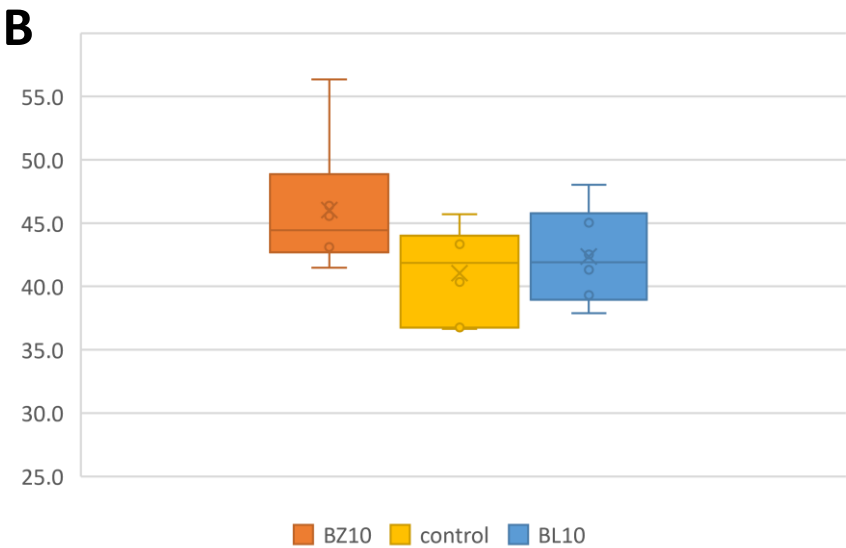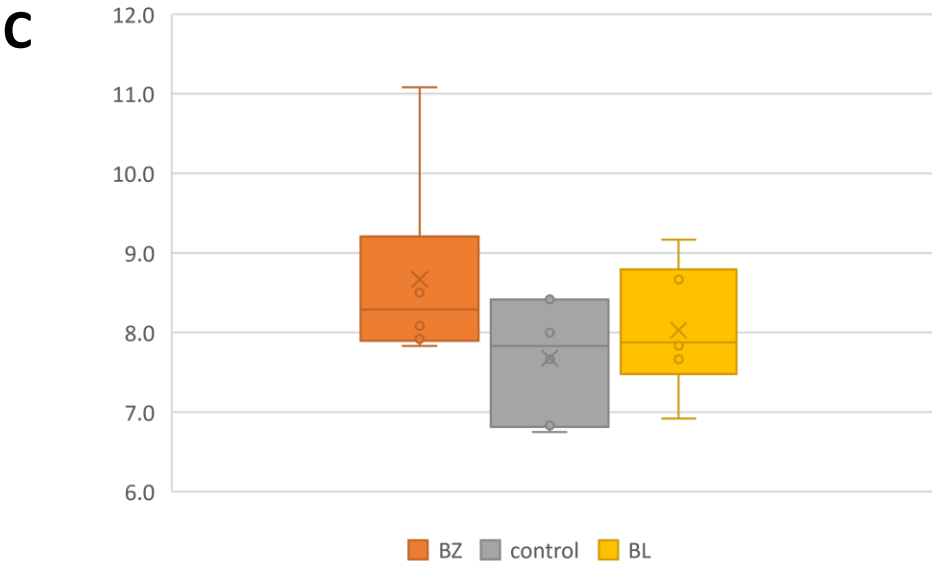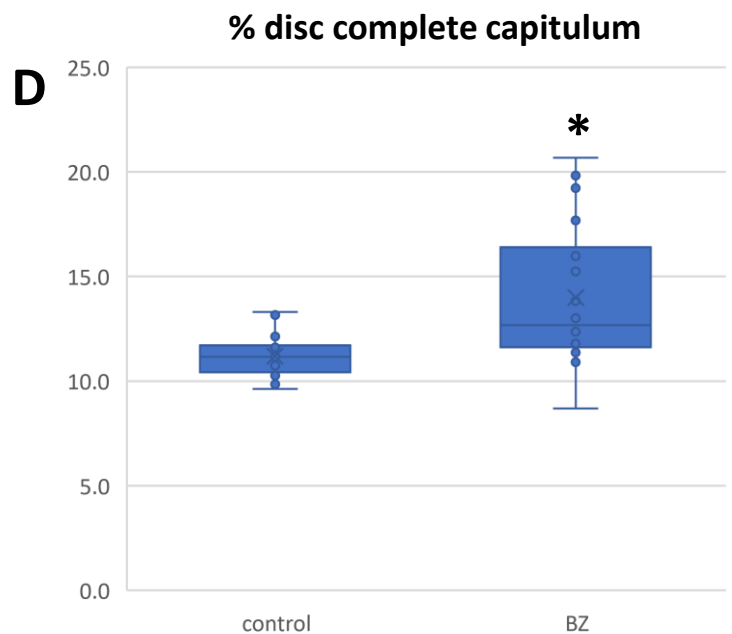

Supplement: s1 [file s1]
